# Supplementary material
Source: PubMed Central journal article supplement (PMC7217417)
Supplement: ASN.2019080790SupplementaryData.pdf [file ASN.2019080790SupplementaryData.pdf]

## **Table of Contents for the Supplemental material**

**Supplementary Figure 1.** Doxycycline alone does not alter transepithelial resistance and claudin-8 expression.

**Supplementary Figure 2.** ENaC  $\gamma$ -subunit silencing decreases claudin-8 expression in cultured collecting duct principal cells.

**Supplementary Figure 3.** Effect of ENaC  $\alpha$ -subunit silencing on claudin-8 abundance in cultured collecting duct principal cells.

**Supplementary Figure 4.** Effect of ENaC  $\beta$ -subunit silencing on claudin-8 abundance in cultured collecting duct principal cells.

**Supplementary Figure 5.** Cell-surface protein biotinylation from cells overexpressing and silencing claudin-8 and cells overexpressing claudin-2 and claudin-10.

**Supplementary Figure 6.** Effect of sodium and chloride transport on measured transepithelial potential difference.

**Supplementary Figure 7.** Effect of nephron-specific  $\alpha$ -ENaC and  $\beta$ -ENaC knockout on claudin-8 abundance.

**Supplementary Figure 8.** Speculated mechanism of interaction between ENaC  $\gamma$ -subunit and claudin-8.

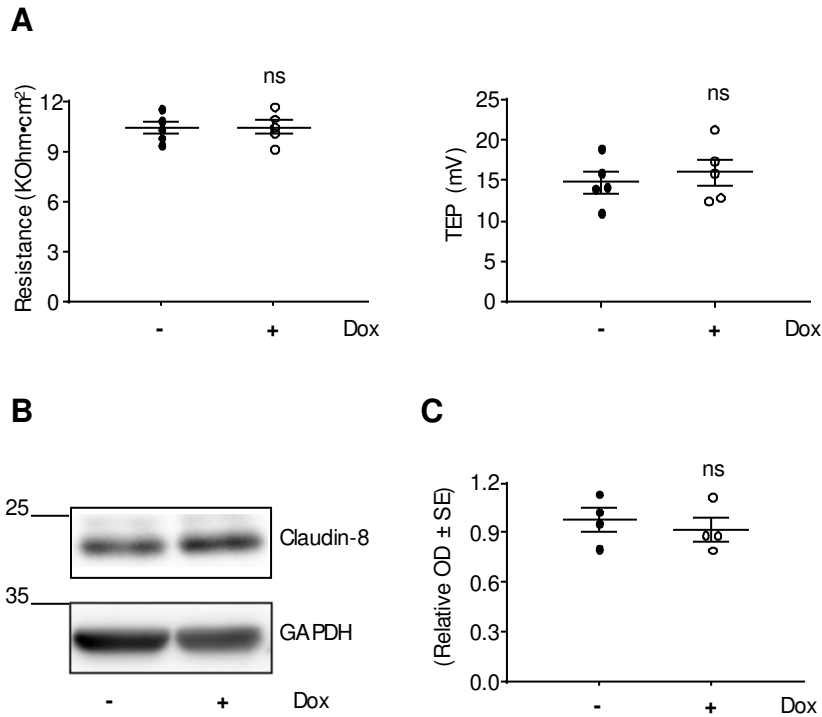

**Supplementary Figure 1. Doxycycline alone does not alter transepithelial resistance, transepithelial potential and claudin-8 expression.** A, Measured transepithelial resistance (R; left panel) and potential difference (TEP; right panel, lumen negative). B, Representative immunoblots showing the effect of Dox treatment on claudin-8 protein abundance. GAPDH was used as a loading control. C, Bar graphs depicting relative densitometric quantification of immunoblots from 4 independent experiments. Results are means  $\pm$  SEM from 4 independent experiments. Statistical analysis was performed by Student's t-test.

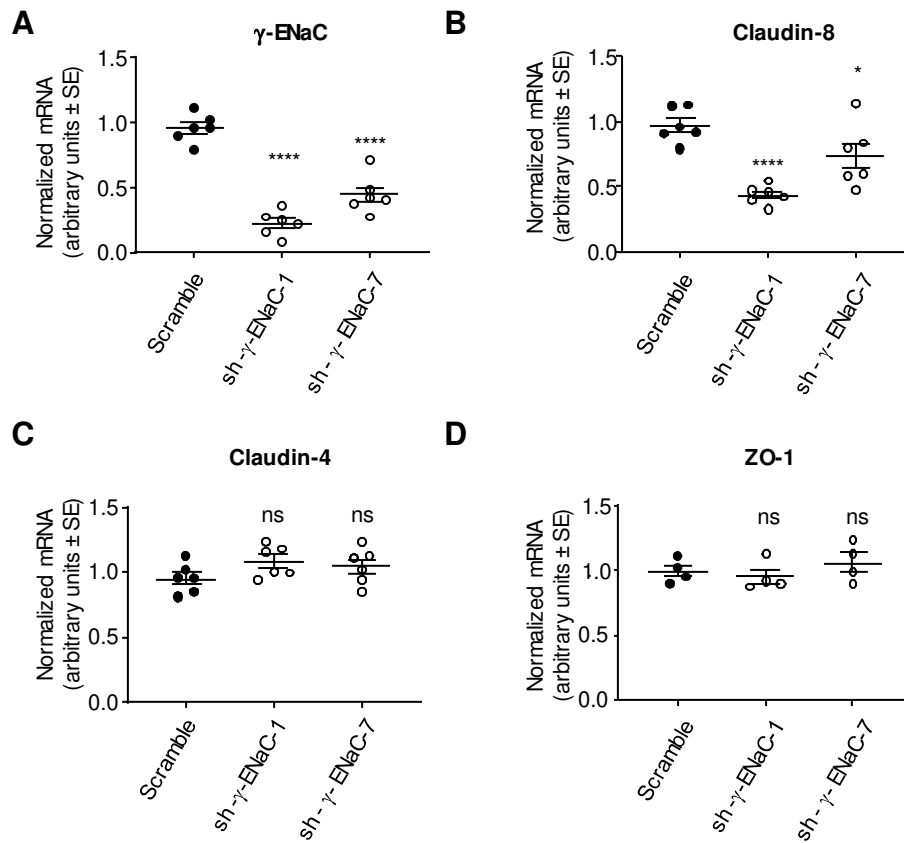

**Supplementary Figure 2. ENaC  $\gamma$ -subunit silencing decreases claudin-8 expression in cultured collecting duct principal cells.** mCCD<sub>cl1</sub> cells transduced with lentiviruses encoding either scramble shRNA (scramble) or shRNAs targeting mouse  $\gamma$ -ENaC (sh- $\gamma$ -ENaC-1 and sh- $\gamma$ -ENaC-7) were grown to confluence on filters. A-D,  $\gamma$ -ENaC, claudin-8, claudin-4 and ZO-1 mRNA levels were assessed by Real-Time PCR. Results are means  $\pm$  SEM from 4 independent experiments. Statistical analysis was performed by one-way ANOVA; \*  $p < 0.05$ ; \*\*  $p < 0.01$ ; \*\*\*  $p < 0.001$ .

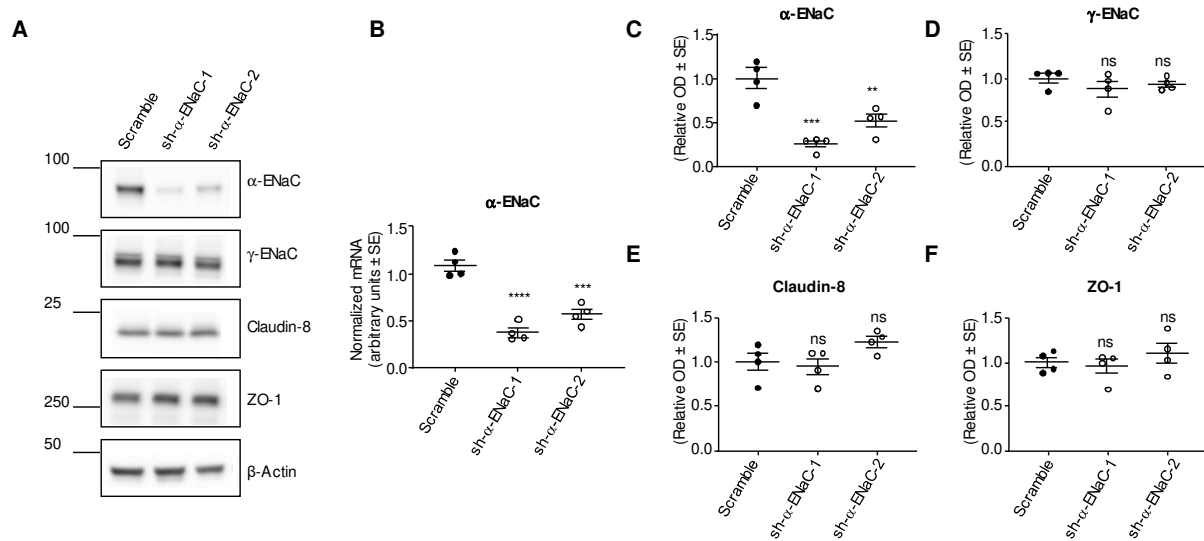

**Supplementary Figure 3. Effect of  $\alpha$ -ENaC silencing on claudin-8 abundance in cultured collecting duct principal cells.** mCCD<sub>cl1</sub> cells transduced with lentiviruses encoding either scramble shRNA (scramble) or shRNAs targeting mouse  $\alpha$ -ENaC (sh- $\alpha$ -ENaC-1 and sh- $\alpha$ -ENaC-2) were grown to confluence on filters. (A) Representative immunoblots showing the effect of  $\alpha$ -ENaC silencing on  $\alpha$ -ENaC,  $\gamma$ -ENaC, claudin-8 and ZO-1 protein levels.  $\beta$ -actin was used as the loading control. (B)  $\alpha$ -ENaC mRNA levels assessed by Real-Time PCR. C-F relative densitometric quantification of immunoblots (shown in A) from 4 independent experiments. Statistical analysis was performed by one-way ANOVA; \*  $p < 0.05$ ; \*\*  $p < 0.01$ ; \*\*\*  $p < 0.001$ .

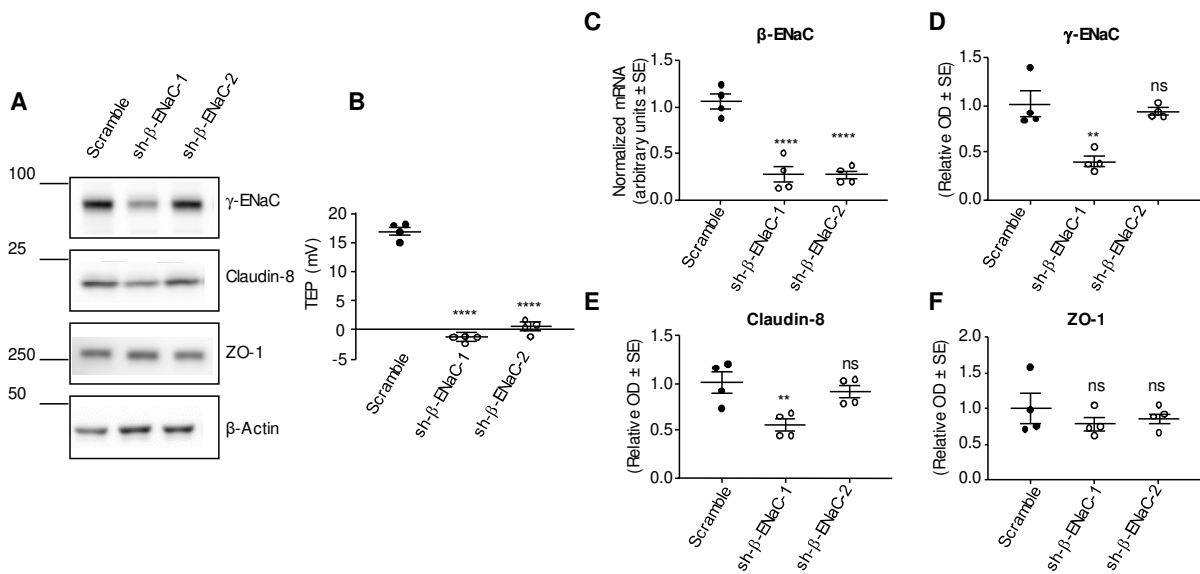

**Supplementary Figure 4. Effect of  $\beta$ -ENaC silencing on claudin-8 abundance in cultured collecting duct principal cells.** mCCD<sub>cl1</sub> cells transduced with lentiviruses encoding either scramble shRNA (scramble) or shRNAs targeting mouse  $\beta$ -ENaC (sh- $\beta$ -ENaC-1 and sh- $\beta$ -ENaC-2) were grown to confluence on filters. (A) Representative immunoblots showing the effect of  $\beta$ -ENaC silencing on  $\gamma$ -ENaC, claudin-8 and ZO-1 protein levels.  $\beta$ -actin was used as the loading control. Measured transepithelial potential difference (TEP, lumen negative) (B) and  $\beta$ -ENaC mRNA levels assessed by Real-Time PCR (C) were used to validate ENaC  $\beta$ -subunit silencing efficacy since we cannot obtain a satisfying signal to noise ratio with the antibody against  $\beta$ -ENaC in mCCD cells. D-F relative densitometric quantification of immunoblots (shown in A) from 4 independent experiments. Statistical analysis was performed by one-way ANOVA; \*  $p < 0.05$ ; \*\*  $p < 0.01$ ; \*\*\*  $p < 0.001$ .

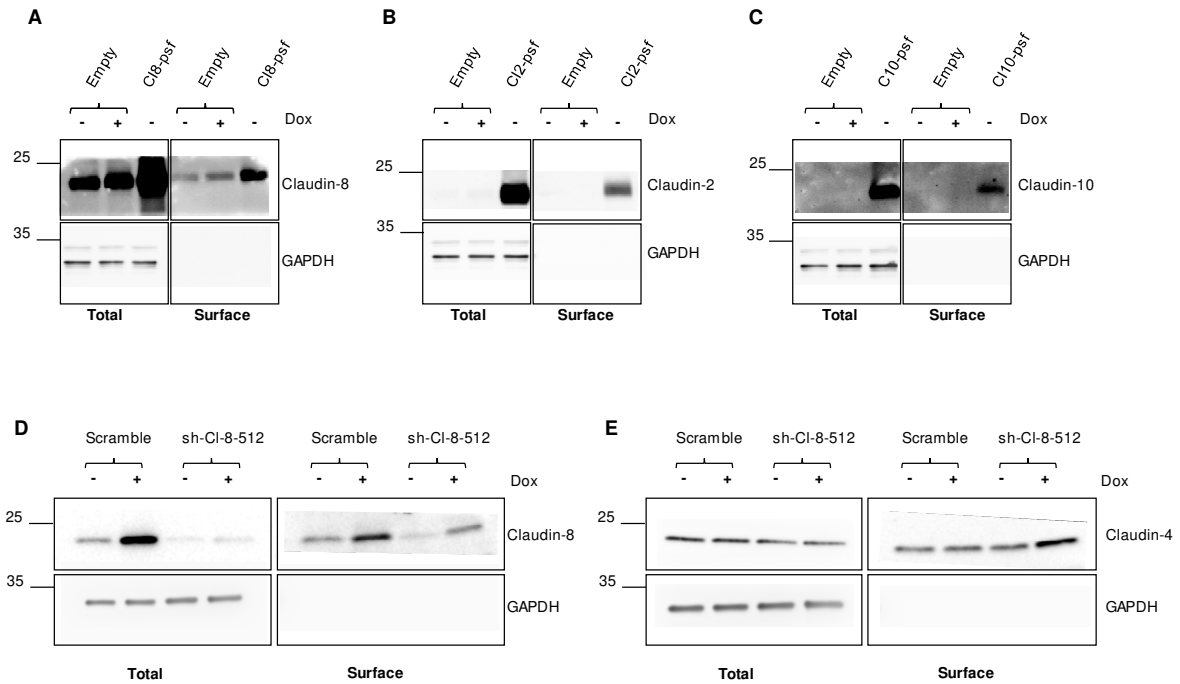

**Supplementary Figure 5. Cell-surface protein biotinylation from cells overexpressing and silencing claudin-8 and cells overexpressing claudin-2 and claudin-10.**  $\gamma$ -ENaC-TetOn- mCCD cells were first transduced with empty lentiviruses (empty) or that encoding wild-type mouse claudin-8 (Cl8-psf), claudin-2 (Cl2-psf) or claudin-10 (Cl10-psf). For the silencing of claudin-8, cells were transduced with lentiviruses encoding either scramble shRNA (scramble) or shRNA targeting mouse claudin-8 (shCl-8-512). Transduced cells were grown to confluence on filters and treated or not with 1.25  $\mu$ g/ml doxycycline (Dox) for 2.5 days. Aliquots of total cell extract and biotinylated proteins were analyzed by western blotting. Cell surface and total expression levels of claudin-8 are shown in (A and D), claudin-2 in (B), claudin-10 in (C) and claudin-4 (E).

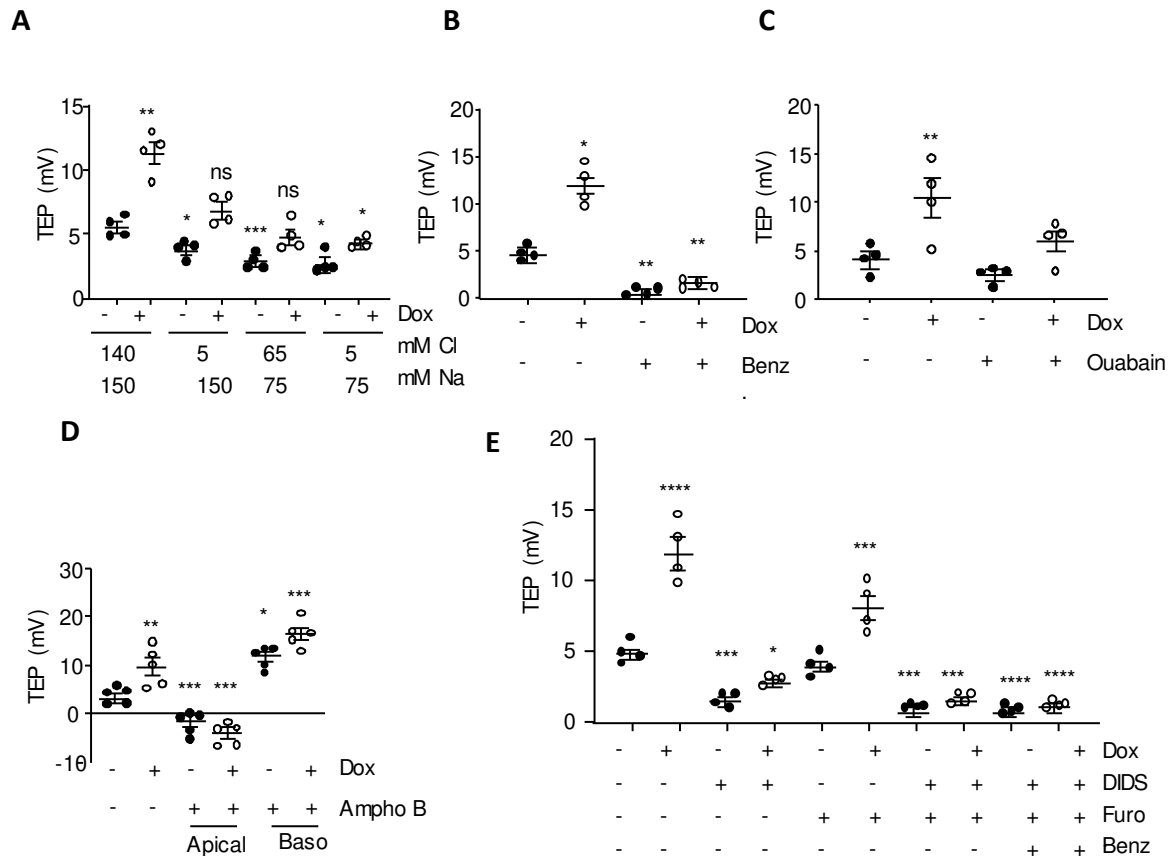

**Supplementary Figure 6. Effect of sodium and chloride transport on measured transepithelial potential difference.**  $\gamma$ -ENaC-TetOn-mCCD cells were grown to confluence on filters and treated or not with 1.25  $\mu$ g/ml doxycycline (Dox) for 2.5 days to induce ENaC  $\gamma$ -subunit overexpression. A-E, Apical medium was removed and replaced for 24 h by iso-osmotic medium containing different concentrations of NaCl, Na-Gluconate or Choline-Cl (A). Cells were treated for 24 h with 10  $\mu$ M benzamil (B), 1  $\mu$ M ouabain (C), 50  $\mu$ g/ml amphotericin B (D) or chloride transport blockers (10  $\mu$ M Furosemide and 100  $\mu$ M DIDS) (E). Potential difference was measured using a Millicell-ERS volt-Ohm meter, lumen negative. Results are means  $\pm$  SEM from 4 independent experiments. Statistical analysis was performed by one-way ANOVA ; \*  $p < 0.05$ ; \*\*  $p < 0.01$ ; \*\*\*  $p < 0.001$ .

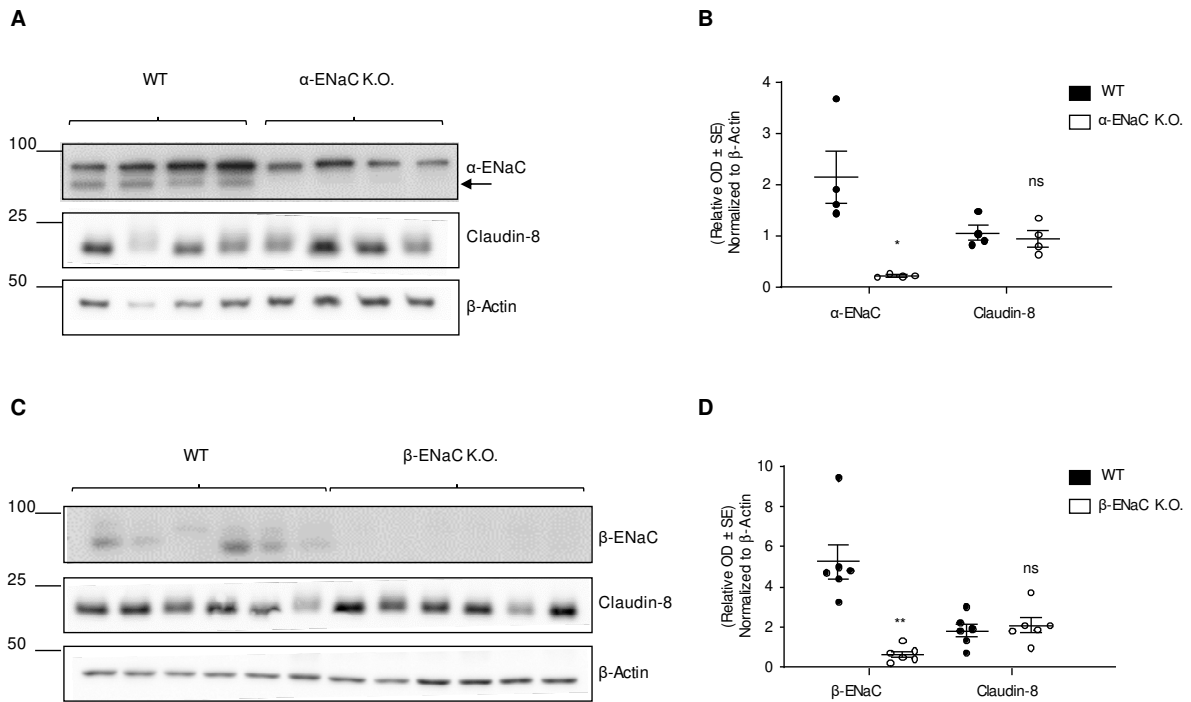

**Supplementary Figure 7. Effect of nephron-specific  $\alpha$ -ENaC and  $\beta$ -ENaC knockout on claudin-8 abundance.** A, Representative immunoblots showing the effect of  $\alpha$ -ENaC knockout on claudin-8 abundance in kidney cortex (controls, n = 4 and experimental  $\alpha$ -ENaC KO mice: n = 4). B, quantification of protein expression levels normalized to  $\beta$ -actin protein expression levels (C) Representative immunoblots showing the effect of  $\beta$ -ENaC knockout on claudin-8 abundance in kidney cortex (controls, n = 6 and experimental  $\beta$ -ENaC KO mice: n = 6). (D) Quantification of protein expression levels normalized to  $\beta$ -actin protein expression levels. Results are presented as mean  $\pm$  SEM. Statistical analysis was performed by Mann-Whitney U-test; \* p < 0.05.



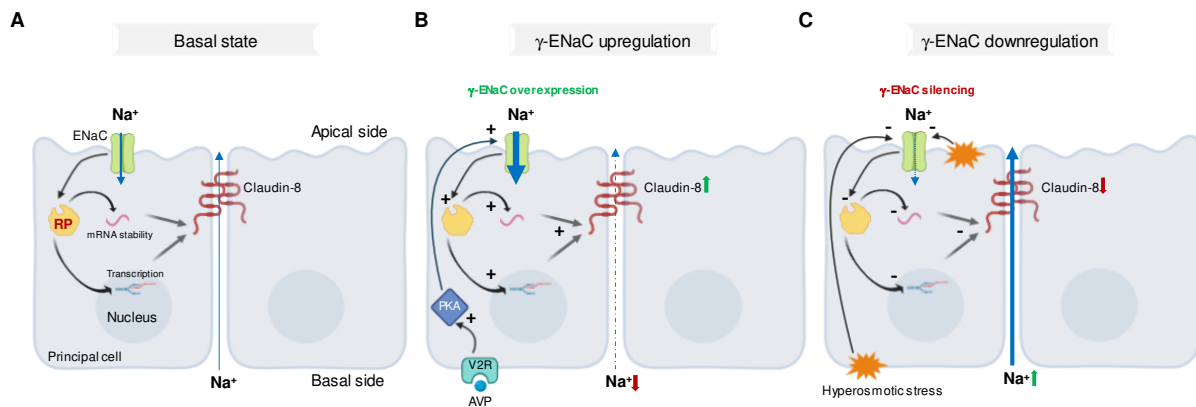

**Supplementary Figure 8. Speculated mechanism of interaction between ENaC  $\gamma$ -subunit and claudin-8.** The mechanism through which interaction between  $\gamma$ -ENaC subunit and claudin-8 takes place is still unclear. Herein, our results demonstrate that physiologic and genetic modulation of  $\gamma$ -ENaC affects claudin-8 abundance in mCCD cells and we confirmed this interaction *in vivo*. Our results are consistent with the hypothesis that  $\gamma$ -ENaC directly interacts with a regulatory protein (RP) which controls claudin-8 transcription and/or claudin-8 mRNA stability as shown in **A**. The stimulation of  $\gamma$ -ENaC by vasopressin (AVP) or its overexpression in mCCD cells, enhances the activity of the regulatory protein (RP) leading to more claudin-8 mRNA expression and higher claudin-8 protein abundance, resulting in a decreased sodium back-flux (**B**). Conversely, the downregulation of  $\gamma$ -ENaC for example by hyperosmotic stress (apical and basal sides) or its silencing in mCCD cells, reduces the activity of the regulatory protein (RP) and then claudin-8 abundance at the mRNA and the protein levels leading to an increased sodium back-flux (**C**).
